# Supplementary material for: Detection of Epstein–Barr virus by a rapid and simple accelerated denaturation bubble-mediated strand exchange amplification method
Source: Royal Society of Chemistry journal article supplement (doi:10.1039/d1ay00347j), 2021-01-01
Supplement: d1ay00347j1.pdf [file d1ay00347j1.pdf]

Table S1. Comparison of ASEA method used in our previous work and this work

| Target           | ASEA protocol                              | Time consumption        | Limit of detection (LOD)            |
|------------------|--------------------------------------------|-------------------------|-------------------------------------|
| CPV <sup>1</sup> | 74°C for <b>1 s</b> , 61°C for <b>1 s</b>  | within <b>16-17 min</b> | <b>4,800 copies mL<sup>-1</sup></b> |
| EBV              | 74°C for <b>10 s</b> , 61°C for <b>5 s</b> | within <b>25 min</b>    | <b>1,000 copies mL<sup>-1</sup></b> |

1. J. Hou, Y. Li, C. Ma and C. Shi, *Analytical Methods*, 2020, **12**, 5514-5522.
